# Supplementary material for: Coordinated crosstalk between microtubules and actin by a spectraplakin regulates lumen formation and branching
Source: eLife. 2020 Oct 28;9:e61111. doi: 10.7554/eLife.61111 (PMC7661041; doi:10.7554/eLife.61111)
Supplement: Figure 1—source data 1. [file elife-61111-fig1-data1.xlsx]

## Sheet: FIG. 1
	TCs affected											TC lumen loss								Different TC phenotypes
	TC total (n)			400			400			400		TC total (n)		820		1000		300		Type	TCs
		wt			Shot 3			btl>shotRNAi					wt		Shot 3		btl>shotRNAi			I	13	partially elongated + lumen
		afected			afected			afected					v	d	v	d	v	d		II	3	partially elongated + lumen primordia
			dorsal	ventral		dorsal	ventral		dorsal	ventral			0	0	4	3	3	5		III	4	partially elongated no lumen
			0	0		10	10		8	6			0	1	1	1	3	5		IV	5	no elongation no lumen
			0	0		3	3		10	6			0	0	1	5	3	3		n	25
			0	0		10	6		3	5			0	0	2	5	4	1
			0	0		10	4		6	4			0	0	0	1	3	2
			1	0		3	2		4	2			0	0	3	1	2	1
			0	0		6	8		6	8			1	0	0	0	3	0
			0	2		2	5		10	5			0	0	3	4	0	0
			0	0		10	6		4	6			0	0	3	5	3	4
			0	2		10	10		9	8			0	0	2	0	4	3
			0	0		3	7		4	1			0	0	2	1	0	0
			0	0		3	5		3	7			1	1	0	2	1	1
			0	0		4	1		3	5			0	0	3	3	2	0
			0	0		6	4		5	4			0	0	2	5	4	0
			2	0		6	4		2	2			0	0	2	2	0	1
			2	0		2	2		6	4			0	0	2	2
			0	0		10	5		9	6			0	1	4	3
			0	0		10	10		10	7			0	0	2	2
			0	0		10	8		10	10			0	2	0	2
			0	0		7	4		6	7			0	0	2	2
			0	0		10	10		10	9			1	0	2	6
													0	0	2	6
													0	0	5	10
	% TC afected total		0.0225			0.6225			0.6				0	0	2	2
	%SEM total		0.014023			0.0688482			0.0581705				0	0	2	2
													0	0	0	0
													0	0	4	3
													0	1	3	3
													0	0	1	2
													0	1	6	6
													0	0	3	0
													0	0	2	1
													0	0	4	10
													0	0	2	1
													1	0	0	1
													0	0	0	0
													0	0	3	7
													0	0	0	3
													0	0	2	6
													0	0	8	5
													0	0	0	5
															2	1
															0	2
															2	3
															2	3
															2	2
															2	2
															1	1
															1	2
															3	2
												% TC no LUMEN total	0.0134146		0.25		0.203333
												%SEM TOTAL	0.00579508		0.028605		0.0423245
