# Supplementary material for: Coordinated crosstalk between microtubules and actin by a spectraplakin regulates lumen formation and branching
Source: eLife. 2020 Oct 28;9:e61111. doi: 10.7554/eLife.61111 (PMC7661041; doi:10.7554/eLife.61111)
Supplement: Figure 2—source data 1. [file elife-61111-fig2-data1.xlsx]

## Sheet: Fig.2
	Extra subcellular lumen (ESL)
	TC total (n)		240		400		800	400	400
		btl>GFP		btl>shotA		btl>shotC		btl>ΔC-tail	btl>C-tail
		v	d	v	d	v	d	v	v
		0	0	2	4	0	2	0	2
		0	0	0	5	2	3	0	1
		0	1	2	3	0	0	0	0
		0	0	0	2	2	6	0	1
		0	0	0	1	1	5	0	1
		0	0	1	2	5	4	0	1
		0	0	0	1	0	3	0	0
		0	0	1	4	2	2	0	0
		0	0	2	5	0	0	0	0
		0	0	0	3	0	1	0	0
		0	0	1	2	1	0	0	2
		0	0	0	3	3	2	0	1
				1	1	0	1	0	2
				0	4	0	3	0	1
				0	2	2	2	0	0
				2	1	1	2	0	2
				3	0	4	3	0	0
				0	1	3	4	2	1
				0	0	0	5	0	1
				0	3	3	3	0	3
						2		3	4
						1		0	1
						0		0	2
						1		0	0
						1		0	0
						1		0	2
						0		0	0
						0		0	2
						0		0	1
						0		0	1
						2		0	2
						1		0	0
						2		0	0
						1		0	2
						0		0	1
						2		0	0
						0		0	0
						1		1	0
						1		0	0
						3		0	0
						4
						1
						2
						0
						0
						2
						0
						2
						1
						1
						2
						0
						0
						2
						1
						0
						0
						0
						0
						0
	Total ESL	1		62		117		6	37
	% ESL	0.00416667		0.155		0.14625		0.015	0.0925
	% SEM	0.00186339		0.0118687		0.00829365		0.00458188	0.00788286
