# Supplementary material for: Coordinated crosstalk between microtubules and actin by a spectraplakin regulates lumen formation and branching
Source: eLife. 2020 Oct 28;9:e61111. doi: 10.7554/eLife.61111 (PMC7661041; doi:10.7554/eLife.61111)
Supplement: Figure 3—source data 1. [file elife-61111-fig3-data1.xlsx]

## Sheet: Fig.3
			Centrosome number in TC
			wt	Rca1	btl>Shot				Bifurcations
			3	1	2				0	1	2	3
			2	2	2			Rca1	0.2	0.22	0.3	0.28
			1	5	3			btl>shotC	42.5%	0.25	22.5%	0.1
			3	1	2			Rca1/+, btl>shotC	0.41	0.45	0.09	0.05
			4	3	2			Rca1, btl>shotC	0.03	0.11	0.29	0.55
			2	4	3
			3	3	3
			1	1	3			Bifurcations
			3	3	2				Rca1	btl>shotC	Rca1/+, btl>shotC	Rca1, btl>shotC
			2	2	2				1	1	1	4
			2	5	2				5	1	0	1
			2	2	2				2	1	0	3
			4	4	1				4	0	0	2
			3	2	2				1	0	1	3
			3	4	2				1	0	1	2
			2	2	2				2	3	1	3
			3	2	2				1	2	0	3
			3	2	2				0	0	0	4
			2	5	1				3	1	1	2
			2	5	2				0	0	1	4
			3	3	2				2	3	0	6
			2	4	1				3	0	1	4
			1	2	2				2	2	1	6
			1	4	1				0	2	0	1
			3	2	2				4	0	0	3
			4	2	2				2	1	0	4
			1	2	3				1	2	0	0
			3	3	2				3	3	2	2
			1	4	4				2	2	1	2
			4	4	3				2	1	6	1
			2	4	2				0	1	0	2
			1	8	4				2	2	1	3
			1	7	3				0	2	2	2
				5					1	1	0	3
				6					3	0	0	2
				3					1	0	0	4
				8					0	2	4
				3					0	0	0
				5					0	0	1
				5					3	2	1
				10					2	3	1
				6					3	0	2
									2	0	1
									2	0	1
		average	2.33333	3.7619	2.21212				1	1	1
		SEM	0.5	0.6	0.2				3	0	1
									1	0	0
									2	0	1
									3	1
