# Supplementary material for: Coordinated crosstalk between microtubules and actin by a spectraplakin regulates lumen formation and branching
Source: eLife. 2020 Oct 28;9:e61111. doi: 10.7554/eLife.61111 (PMC7661041; doi:10.7554/eLife.61111)
Supplement: Figure 6—source data 1. [file elife-61111-fig6-data1.xlsx]

## Sheet: FIG. 6
	TC lumen loss
	TC total (n)		400		240		240		240		240		400		400		320
		wt		shot3 btl>ShotA		shot3 btl>ShotC		shot3 btl>Ctail		shot3 btl>∆Ctail		shotk		shot∆EGC		shotK/shot∆EGC
		v	d	v	d	v	d	v	d	v	d	v	d	v	d	v	d
		0	0	0	1	1	0	4	1	0	1	3	4	4	2	5	2
		0	1	1	2	0	2	3	2	3	2	2	1	1	3	4	4
		0	0	0	0	0	1	0	2	3	1	3	2	3	3	3	3
		0	0	0	0	0	0	1	5	2	0	2	4	4	2	2	5
		0	0	2	0	1	0	4	0	2	1	1	2	0	0	0	0
		0	0	0	0	6	4	2	4	3	2	2	1	3	1	2	3
		1	0	1	0	2	2	1	2	0	1	4	2	4	0	0	0
		0	0	1	0	1	2	1	1	7	1	1	0	3	2	3	3
		0	0	2	1	3	0	1	6	2	0	2	0	3	2	2	2
		0	0	0	0	1	5	1	2	1	1	1	3	0	2	0	0
		0	0	0	0	4	2	4	2	2	0	1	2	0	0	0	0
		1	1	1	0	8	2	5	4	5	2	3	2	0	1	2	2
		0	0									0	0	4	2	1	1
		0	0									3	4	0	0	1	1
		0	0									3	2	3	0	0	0
		0	0									1	2	1	2	6	3
		0	1									2	0	3	3
		0	0									0	0	1	2
		0	1									2	1	3	1
		0	0									1	3	2	2
	% TC no LUMEN total	0.0134146		0.05		0.195833		0.241667		0.175		0.18		0.18		0.1875
	%SEM TOTAL	0.00579508		0.0206379		0.0602923		0.0496514		0.0391976		0.0275163		0.0291125		0.0434924
