# Supplementary material for: Coordinated crosstalk between microtubules and actin by a spectraplakin regulates lumen formation and branching
Source: eLife. 2020 Oct 28;9:e61111. doi: 10.7554/eLife.61111 (PMC7661041; doi:10.7554/eLife.61111)
Supplement: Figure 7—source data 1. [file elife-61111-fig7-data1.xlsx]

## Sheet: Fig.7
		Shot Accumulation (arbitrary units)
		bs/+		bs/bs
		TC	SC	TC	SC
		26	11.3	0.317004	6.07866
		30.347	17.02	0.387423	6.54122
		12.0272	23	7.7507	18.8834
		6.43962	6	4.09796	11.7058
		9.85945	4.5	6.74192	11.5144
		9.74152	23	2.82935	13.316
		9.0511	6	1.54643	8.82104
		15	12	4.05729	7.07015
		23	15	3.58883	7.26715
		15.7184	13.0911	3.38154	10.9801
		TCs with extended lumen
		bs/+	bs/bs	bs;btl>shot
		1	0.214286	0.571429
		1	0.0714286	0.428571
		1	0.0714286	0.357143
		1	0	0.857143
		1	0	0.428571
		0.928571	0	0.857143
		1	0	0.714286
		1	0.285714	0.857143
		1	0.142857	0.571429
		1	0.0714286	0.714286
		0.928571	0.214286	0.642857
		1	0.0714286	0.785714
		1	0.142857	0.571429
		1	0	0.642857
		1	0.428571	0.714286
		0.857143	0.0714286	0.642857
		1	0	0.571429
		1	0.0714286	0.571429
		1	0.357143	0.928571
		1	0.214286	0.785714
		1	0.428571	0.785714
		1	0.285714	0.714286
		1	0.0714286	0.857143
		1	0	0.642857
		1	0.0714286	1
		1	0.142857	0.928571
		1	0.5	0.928571
		1	0.642857	0.857143
		1	0.357143	0.714286
		1	0.428571	0.857143
		1	0.428571
		1	0
		1	0.285714
		1	0
		1	0.571429
		1	0.214286
		1	0.214286
		0.857143	0.5
		0.928571	0.642857
		1	0.142857
		1
		1
		1
		1
		1
		1
		1
		1
		1
		1
