# Supplementary material for: Coordinated crosstalk between microtubules and actin by a spectraplakin regulates lumen formation and branching
Source: eLife. 2020 Oct 28;9:e61111. doi: 10.7554/eLife.61111 (PMC7661041; doi:10.7554/eLife.61111)
Supplement: Figure 8—source data 1. [file elife-61111-fig8-data1.xlsx]

## Sheet: Fig.8
	Extra subcellular lumen (ESL)
	TC total (n)		240		400		440		300
		btl>GFP		btl>shotA		btl>Tau		2xbtl>2xTau
		v	d	v	d	v	d	v	d
		0	0	2	4	1	0	0	0
		0	0	0	5	0	2	0	2
		0	1	2	3	0	1	3	2
		0	0	0	2	0	0	1	1
		0	0	0	1	0	0	2	1
		0	0	1	2	0	0	3	2
		0	0	0	1	1	1	2	2
		0	0	1	4	0	1	2	1
		0	0	2	5	0	0	0	1
		0	0	0	3	1	0	0	2
		0	0	1	2	0	0	0	1
		0	0	0	3	0	0	0	1
				1	1	1	2	1	3
				0	4	0	0	1	1
				0	2	2	1	0	2
				2	1	0	0
				3	0	0	0
				0	1	0	0
				0	0	1	2
				0	3	0	0
						1	0
						0	2
	Total ESL	1		62		117		6
	% ESL	0.00416667		0.155		0.0455		12.33%
	% SEM	0.00186339		0.0118687		0.0053		0.0089
	TC lumen loss
	TC total (n)		400		400		180		180		440		260
		wt		shot3		tau		shot3 tau		shot3 btl>tau		shot3 2xbtl>2xtau
		v	d	v	d	v	d	v	d	v	d	v	d
		0	0	4	3	0	0	8	10	1	0	2	3
		0	1	1	1	0	0	10	10	0	2	4	1
		0	0	1	5	0	1	10	10	2	1	1	4
		0	0	2	5	0	0	7	8	1	2	0	1
		0	0	0	1	2	0	5	10	2	1	0	0
		0	0	3	1	0	0	7	7	1	0	0	0
		1	0	0	0	0	0	10	10	0	1	4	0
		0	0	3	4	0	1	10	10	6	9	1	0
		0	0	3	5	1	0	6	5	5	7	0	0
		0	0	2	0					3	5	0	0
		0	0	2	1					2	8	0	0
		1	1	0	2					0	4	0	2
		0	0	3	3					2	3	0	0
		0	0	2	5					3	3
		0	0	2	2					0	2
		0	0	2	2					1	5
		0	1	4	3					4	5
		0	0	2	2					0	0
		0	1	2	6					6	2
		0	0	2	6					0	0
										2	2
										5	4
	% TC no LUMEN total	0.0134146		0.05		0.0278		0.85		0.25		0.0885
	%SEM TOTAL	0.00579508		0.0206379		0.0191		0.0633		0.0492		0.0394
