# Supplementary material for: Coordinated crosstalk between microtubules and actin by a spectraplakin regulates lumen formation and branching
Source: eLife. 2020 Oct 28;9:e61111. doi: 10.7554/eLife.61111 (PMC7661041; doi:10.7554/eLife.61111)
Supplement: Figure 9—source data 1. [file elife-61111-fig9-data1.xlsx]

## Sheet: Sheet1
		B. Points	SD B. Points	Nº lúmens	SD lúmens	% lumen	n				n lumina
	GFP	16.9	1.4	1	0	100	10				GFP	shot-A	shot-Ctail	shot-DCtail	tau
	shot-A	16.5	2.08	3	0.7	100	10				1	3	3	2	2
	shot-RNAi	6.5	0.58	ND	ND	40	10				1	2	2	1	2
	shot-DCtail	12.67	0.82	1.1	0.4	100	10				1	4	2	1	2
	Tau	15.3	2.3	2.2	0.5	100	10				1	3	2	1	3
	shot-Ctail	16	1.9	2.33	0.52	100	10				1	3	3	1	2
											1	2	3	1	2
											1	2	2	1	2
											1	4	2	1	3
											1	3	3	1	2
											1	4	2	2	3
										average	1	3	2.33	1.1	2.2
										n	10	10	10	10	10
											Branching points
											GFP	shot-A	shot-DCtail	Tau	shot-Ctail	shot-RNAi
											18	18	16	15	17	8
											16	19	14	14	18	9
											17	16	12	16	16	5
											15	17	11	16	16	3
											16	15	14	14	15	6
											18	14	12	17	17	4
											15	17	11	15	14	8
											19	16	10	16	16	7
											18	18	13	13	14	8
											17	15	14	17	17	7
										average	16.9	16.5	12.7	15.3	16	6.5
										n	10	10	10	10	10	10
